# Supplementary material for: Stretching of viscoelastic drops in steady sliding
Source: Royal Society of Chemistry journal article supplement (doi:10.1039/c7sm00352h), 2017-01-01
Supplement: c7sm00352h1.pdf [file c7sm00352h1.pdf]

There is no supplementary information available for this article.
